# Supplementary material for: Transcript and blood-microbiome analysis towards a blood diagnostic tool for goats affected by Haemonchus contortus
Source: PubMed Central journal article supplement (PMC8967894; doi:10.1038/s41598-022-08939-x), 2022-03-30
Supplement: 41598_2022_8939_MOESM1_ESM.pdf [file 41598_2022_8939_MOESM1_ESM.pdf]

## Legends for Supplementary Tables

### **Transcript and blood-microbiome analysis towards a blood diagnostic tool for goats affected by *Haemonchus contortus***

Yonathan Tilahun<sup>a,\*</sup>, Jessica Quijada Pinango<sup>a</sup>, Felicia Johnson<sup>a</sup>, Charles Lett<sup>a</sup>, Kayla Smith<sup>a</sup>, Terry Gipson<sup>a</sup>, Malcolm McCallum<sup>a</sup>, Peter Hoyt<sup>b</sup>, Andrew Tritt<sup>c</sup>, Archana Yadav<sup>d</sup>, Mostafa Elshahed<sup>d</sup>, and Zaisen Wang<sup>a</sup>

Supplementary Table S1. Average of Shannon and Simpson indices results for 7 dpi using Kraken.

Supplementary Table S2. Average of Shannon and Simpson indices results for 21 dpi. using Kraken.

Supplementary Table S3. Average number of sequences over different treatments at 7 dpi and 21 dpi using Mothur.

Supplementary Table S4. Raw number of sequences in samples for 21 dpi. The Mothur calculated *Firmicutes/Bacteroidetes* (*F/B*) ratios.
